# Supplementary material for: Epoxy-matrix polyaniline/p-phenylenediamine-functionalised graphene oxide coatings with dual anti-corrosion and anti-fouling performance
Source: Royal Society of Chemistry journal article supplement (doi:10.1039/d0ra10665h), 2021-01-01
Supplement: d0ra10665h1.pdf [file d0ra10665h1.pdf]

Supporting Document

Epoxy-matrix polyaniline/p-phenylenediamine-functionalised graphene oxide coatings with dual anti-fouling and anti-corrosion performance

*Sara Fazli-Shokouhi<sup>1</sup>, Farzad Nasirpour<sup>1,\*</sup>, Maasoumeh Khatamian<sup>2</sup>*

<sup>1</sup> Faculty of Materials Engineering, Sahand University of Technology, Tabriz, Iran

<sup>2</sup> Department of Inorganic Chemistry, Faculty of Chemistry, University of Tabriz, Tabriz, Iran

Keywords: Polyaniline (PANI); Graphene oxide (GO); p-phenylenediamine (PPDA); p-phenylenediamine-graphene oxide (PGO); Epoxy, Anticorrosion; Antifouling

**Table S1.** A comparison between the best performance coating of present study and other related coatings.

| NO. | Type of coating                                 | Resistance of pure epoxy coating after a definite time of immersion ( $\Omega \cdot \text{cm}^2$ ) | Highest resistance of composite coating after a definite time of immersion ( $\Omega \cdot \text{cm}^2$ ) | Ref.         |
|-----|-------------------------------------------------|----------------------------------------------------------------------------------------------------|-----------------------------------------------------------------------------------------------------------|--------------|
| 1   | Epoxy/PANI-ZnO(EPZ)-4wt.% ZnO                   | $2.98 \times 10^4$ (30 days)                                                                       | $2.56 \times 10^9$ (30 days)                                                                              | 40           |
| 2   | E/SiO <sub>2</sub> -GO                          | $10^4$ (28 days)                                                                                   | $10^8$ (28 days)                                                                                          | 41           |
| 3   | 2wt.% TiO <sub>2</sub> -GO/epoxy                | $52 \times 10^3$ (90 h)                                                                            | $61.4 \times 10^3$ (90h)                                                                                  | 42           |
| 4   | 2 wt.% GO-Al <sub>2</sub> O <sub>3</sub> /epoxy | $53.57 \times 10^3$ (60 h)                                                                         | $53.57 \times 10^3$ (240h)                                                                                | 43           |
| 5   | Epoxy/PANI-GON (12 wt%)                         | $1.44 \times 10^4$ (192h)                                                                          | $3.45 \times 10^6$ (192h)                                                                                 | 44           |
| 6   | PG1-painted low-carbon steel                    | $1.56 \times 10^3$ (96h)                                                                           | $33 \times 10^3$ (96h)                                                                                    | 45           |
| 7   | GON-An02E                                       | $1.8 \times 10^8$ (35 days)                                                                        | $4 \times 10^9$ (35 days)                                                                                 | 47           |
| 8   | E/PANI-PGO(0.2)                                 | $1.00 \times 10^4$ (192h)                                                                          | $1.05 \times 10^7$ (192h)                                                                                 | Present work |

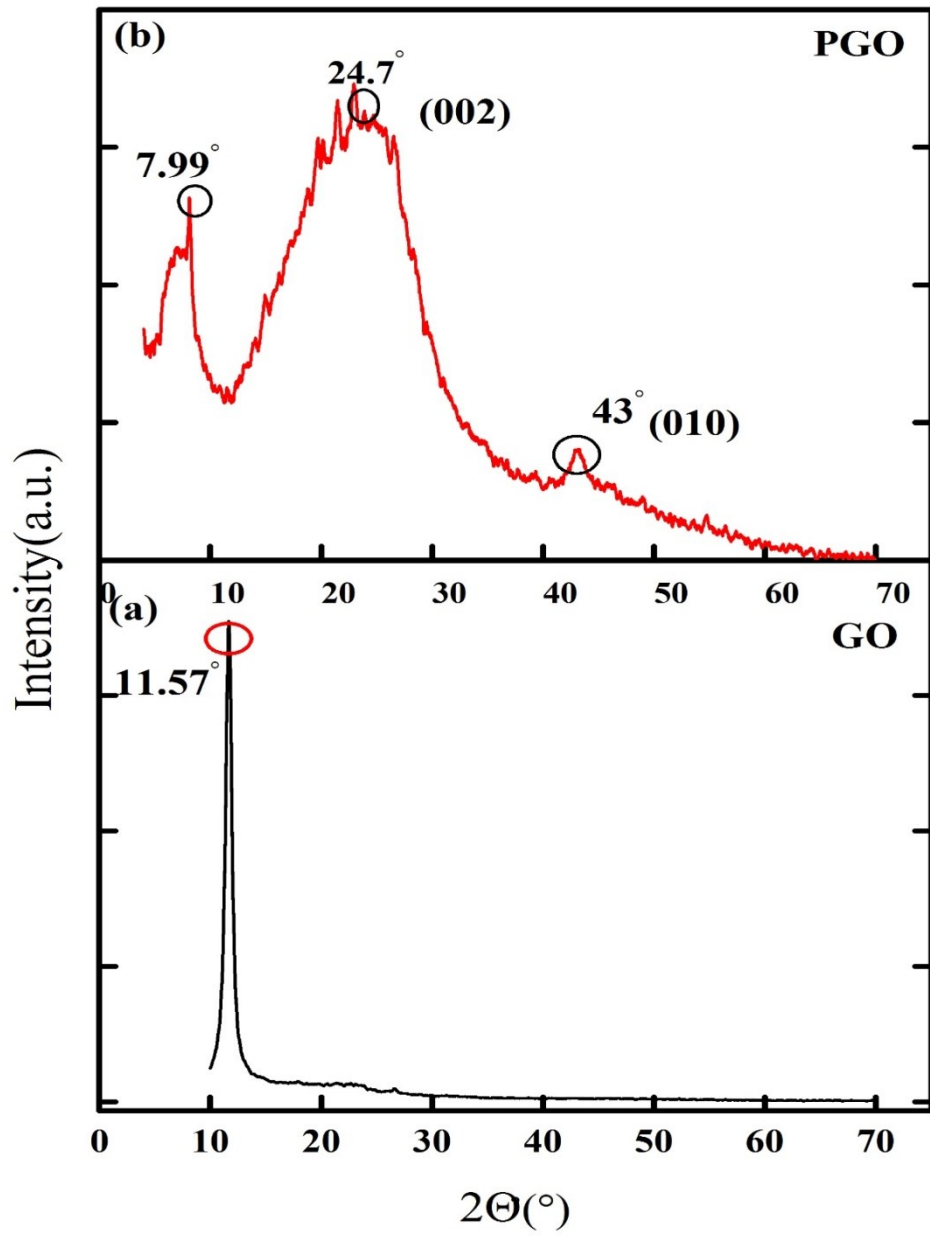

Figure S1. XRD diffraction patterns of GO and PGO.

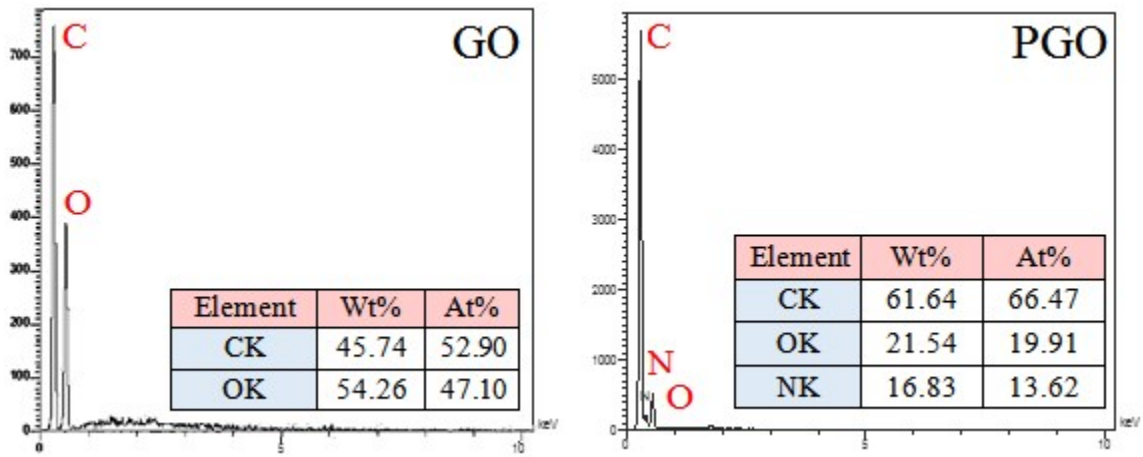

**Figure S2.** EDX spectra of GO and PGO.
